# Supplementary material for: Effects of pimobendan in cats with hypertrophic cardiomyopathy and recent congestive heart failure: Results of a prospective, double‐blind, randomized, nonpivotal, exploratory field study
Source: PubMed Central journal article supplement — J Vet Intern Med. 2021 Feb 5;35(2):789–800. doi: 10.1111/jvim.16054 (PMC7995419; doi:10.1111/jvim.16054), 2021-02-05
Supplement: JVIM-35-789-s002.pdf [file JVIM-35-789-s002.pdf]

**Table S3** – Summary statistics of the echocardiographically estimated\* peak systolic pressure gradient (mmHg) across the left ventricular outflow tract (LVOT) for each examination in *all* cats (FAS, n=76)

| Treatment         | Visit | N  | N miss | Mean | SD | Min | Q1 | Median | Q3 | Max |
|-------------------|-------|----|--------|------|----|-----|----|--------|----|-----|
| <b>Pimobendan</b> | D0    | 39 | 0      | 37   | 48 | 2   | 5  | 9      | 72 | 153 |
|                   | D0-pp | 39 | 0      | 41   | 47 | 2   | 5  | 12     | 74 | 150 |
|                   | D10   | 26 | 8      | 28   | 39 | 3   | 5  | 8      | 31 | 142 |
|                   | D60   | 25 | 0      | 18   | 31 | 2   | 4  | 6      | 9  | 122 |
|                   | D180  | 20 | 0      | 16   | 27 | 2   | 3  | 4      | 7  | 91  |
| <b>Placebo</b>    | D0    | 37 | 0      | 36   | 44 | 1   | 6  | 16     | 47 | 171 |
|                   | D0-pp | 37 | 0      | 32   | 38 | 1   | 5  | 11     | 47 | 139 |
|                   | D10   | 30 | 5      | 31   | 39 | 2   | 6  | 17     | 36 | 155 |
|                   | D60   | 31 | 1      | 23   | 36 | 2   | 5  | 12     | 27 | 170 |
|                   | D180  | 21 | 0      | 23   | 37 | 2   | 6  | 9      | 18 | 168 |

*Notes:* \*, pressure gradient (mmHg) =  $4 \times V \text{ (m/s)}^2$ . There was no difference ( $P > .05$ ) between groups at baseline (D0) and D10, D60, and D180.

Abbreviations: N miss, number of missing values. D0-pp, study on Day0 two to five hours post medication.

## Reference

2. Fox PF, Keene BW, Lamb K, et al. International collaborative study to assess cardiovascular risk and evaluate long-term health in cats with preclinical hypertrophic cardiomyopathy and apparently healthy cats: The REVEAL study. *J Vet Intern Med* 2018;32:930-943.
