# Supplementary material for: Effects of pimobendan in cats with hypertrophic cardiomyopathy and recent congestive heart failure: Results of a prospective, double‐blind, randomized, nonpivotal, exploratory field study
Source: PubMed Central journal article supplement — J Vet Intern Med. 2021 Feb 5;35(2):789–800. doi: 10.1111/jvim.16054 (PMC7995419; doi:10.1111/jvim.16054), 2021-02-05
Supplement: JVIM-35-789-s003.pdf [file JVIM-35-789-s003.pdf]

**Table S1** – Schedule of events during the 180-day study period

| Event                                         | Day                                         |                                                |                 |                 |                 |                  |                  |                  | Unscheduled |
|-----------------------------------------------|---------------------------------------------|------------------------------------------------|-----------------|-----------------|-----------------|------------------|------------------|------------------|-------------|
|                                               | -1 to 0 <sup>1</sup>                        | 0                                              | 10 <sup>2</sup> | 60 <sup>3</sup> | 90 <sup>3</sup> | 120 <sup>3</sup> | 150 <sup>3</sup> | 180 <sup>3</sup> |             |
| Owner consent                                 | x                                           |                                                |                 |                 |                 |                  |                  |                  |             |
| QOL <sup>4</sup>                              | x                                           | To be conducted weekly throughout study period |                 |                 |                 |                  |                  |                  |             |
| Blood pressure                                | x                                           |                                                | x               | x               |                 |                  |                  | x                | x           |
| Blood pressure in cats 2 to 5 hours post pill |                                             | x                                              |                 |                 |                 |                  |                  |                  |             |
| Physical exam                                 | x                                           |                                                | x               | x               |                 |                  |                  | x                | x           |
| Body weight                                   | x                                           |                                                | x               | x               |                 |                  |                  | x                | x           |
| CBC, Blood Biochemistry                       | x                                           |                                                | (x)             | x               |                 |                  |                  | x                | (x)         |
| Total serum thyroxine <sup>5</sup>            | x                                           |                                                |                 |                 |                 |                  |                  |                  |             |
| Thoracic radiographs                          | x                                           |                                                | (x)             | (x)             |                 |                  |                  | x                | x           |
| Echocardiography for diagnosis <sup>5</sup>   | x                                           |                                                |                 |                 |                 |                  |                  |                  |             |
| Complete echocardiography                     |                                             | x                                              |                 | x <sup>6</sup>  |                 |                  |                  | x <sup>6</sup>   | x           |
| Focused echocardiography                      |                                             | x <sup>6</sup>                                 | x <sup>6</sup>  |                 |                 |                  |                  |                  |             |
| ECG                                           | x                                           |                                                | (x)             | (x)             |                 |                  |                  | (x)              | (x)         |
| Morbidity assessment                          |                                             | x                                              | x               |                 |                 |                  |                  | x                | x           |
| Accountability of tablets                     |                                             | x                                              | x               |                 |                 |                  |                  | x                |             |
| Dispensing tablets                            |                                             | x                                              | x               | x               |                 |                  |                  |                  |             |
| Begin of study medications <sup>7</sup>       |                                             | x                                              |                 |                 |                 |                  |                  |                  |             |
| Owner dosing log <sup>8</sup>                 | To be conducted throughout the study period |                                                |                 |                 |                 |                  |                  |                  |             |
| Telephone follow up <sup>9</sup>              |                                             |                                                |                 |                 | x               | x                | x                |                  | x           |

*Notes:* <sup>1</sup>The Screening examination was performed between D-1 and D0. <sup>2</sup>The examination was done +/- 4 days of the target date. <sup>3</sup>The investigations/telephone follow-up was done +/- 7 days of the target date. <sup>4</sup>QOL (quality of life) according to scoring system to be documented by owner. <sup>5</sup>Total serum thyroxine test results and echocardiography for diagnosis completed approximately within 1 month (= 30 days) prior to D0 or on D0. <sup>6</sup>Echocardiography to be performed approximately 2 to 5 hours post dosing with focus on the LVOT from different imaging views. <sup>7</sup>Furosemide (Salix®/Furozénol®) and pimobendan/placebo +/- clopidogrel. <sup>8</sup>Owner log includes daily documentation of tablet administration, daily tablet acceptance. <sup>9</sup>Review completion of owner documentation, documentation of unscheduled visits to other veterinarians or other relevant issues. ( ) Parentheses indicate optional examinations.
