# Supplementary material for: Effects of pimobendan in cats with hypertrophic cardiomyopathy and recent congestive heart failure: Results of a prospective, double‐blind, randomized, nonpivotal, exploratory field study
Source: PubMed Central journal article supplement — J Vet Intern Med. 2021 Feb 5;35(2):789–800. doi: 10.1111/jvim.16054 (PMC7995419; doi:10.1111/jvim.16054), 2021-02-05
Supplement: JVIM-35-789-s004.pdf [file JVIM-35-789-s004.pdf]

**Table S9** – Frequency of cardiac death, cardiac euthanasia, and daily dose of furosemide > 10 m/kg in the PPS2 population (n=59)

|                                     | Pimobendan |      | Placebo |      | Total  |      |
|-------------------------------------|------------|------|---------|------|--------|------|
|                                     | (n=30)     |      | (n=29)  |      | (n=59) |      |
|                                     | N          | %    | N       | %    | N      | %    |
| Euthanasia                          | 3          | 10   | 2       | 6.9  | 5      | 8.5  |
| Death                               | 1          | 3.3  | 1       | 3.4  | 2      | 3.4  |
| Daily dose of furosemide > 10 mg/kg | 4          | 13.3 | 4       | 13.8 | 8      | 13.6 |

Abbreviations: PPS2, per protocol analysis set population.
