# Supplementary material for: Effects of pimobendan in cats with hypertrophic cardiomyopathy and recent congestive heart failure: Results of a prospective, double‐blind, randomized, nonpivotal, exploratory field study
Source: PubMed Central journal article supplement — J Vet Intern Med. 2021 Feb 5;35(2):789–800. doi: 10.1111/jvim.16054 (PMC7995419; doi:10.1111/jvim.16054), 2021-02-05
Supplement: JVIM-35-789-s005.pdf [file JVIM-35-789-s005.pdf]

**Table S7** – Cochran-Mantel-Haenszel statistics for the primary endpoint successful completion of the study without increase in furosemide dose for the entire per protocol set 2 (PPS2) population and the PPS2 population divided into strata

|          | Treatment group | N-1 | N-2 | Odds Ratio | 95% CI      |
|----------|-----------------|-----|-----|------------|-------------|
| All      | Pimobendan      | 30  | 11  | 1.019      | 0.34 – 3.09 |
|          | Placebo         | 29  | 12  |            |             |
| LVOTO    | Pimobendan      | 8   | 4   | 0.625      | 0.11 – 3.71 |
|          | Placebo         | 13  | 8   |            |             |
| No LVOTO | Pimobendan      | 22  | 7   | 1.40       | 0.33 – 5.93 |
|          | Placebo         | 16  | 4   |            |             |

*Notes:* There was no statistical difference between treatments in each group ( $P > .05$ ).

Abbreviations: N-1, all cats. N-2, cats that reached the primary endpoint of successful outcome at D180. CI, confidence interval; LVOTO, left ventricular outflow tract obstruction.
