# Supplementary material for: Effects of pimobendan in cats with hypertrophic cardiomyopathy and recent congestive heart failure: Results of a prospective, double‐blind, randomized, nonpivotal, exploratory field study
Source: PubMed Central journal article supplement — J Vet Intern Med. 2021 Feb 5;35(2):789–800. doi: 10.1111/jvim.16054 (PMC7995419; doi:10.1111/jvim.16054), 2021-02-05
Supplement: JVIM-35-789-s006.pdf [file JVIM-35-789-s006.pdf]

**Table S5** – Summary statistics on the echocardiographically estimated\* systolic pressure gradient (mmHg) across the left ventricular outflow tract (LVOT) for each examination in cats *without* LVOT obstruction (FAS, n=47)

| Treatment         | Visit | N  | N miss | Mean | SD | Min | Q1 | Median | Q3 | Max |
|-------------------|-------|----|--------|------|----|-----|----|--------|----|-----|
| <b>Pimobendan</b> | D0    | 25 | 0      | 6    | 4  | 2   | 3  | 5      | 8  | 14  |
|                   | D0-pp | 25 | 0      | 11   | 13 | 2   | 3  | 6      | 10 | 51  |
|                   | D10   | 19 | 6      | 9    | 6  | 3   | 4  | 6      | 14 | 21  |
|                   | D60   | 19 | 0      | 5    | 2  | 2   | 3  | 5      | 6  | 9   |
|                   | D180  | 14 | 0      | 4    | 2  | 2   | 3  | 4      | 5  | 7   |
| <b>Placebo</b>    | D0    | 22 | 0      | 8    | 6  | 1   | 4  | 6      | 10 | 22  |
|                   | D0-pp | 22 | 0      | 9    | 10 | 1   | 3  | 5      | 9  | 42  |
|                   | D10   | 17 | 3      | 8    | 6  | 2   | 3  | 6      | 9  | 23  |
|                   | D60   | 16 | 1      | 6    | 5  | 2   | 3  | 6      | 7  | 20  |
|                   | D180  | 9  | 0      | 10   | 11 | 2   | 4  | 6      | 9  | 37  |

*Notes:* \*, pressure gradient (mmHg) =  $4 \times V \text{ (m/s)}^2$ . Due to the small number of observations and multiple comparisons, *P* values for between-day and between-group comparisons are not reported.<sup>42,43</sup>

Abbreviations: FAS, full analysis set population; N miss, number of missing values; D0-pp, study on D0 2-5 hours post medication.

## References

2. Fox PF, Keene BW, Lamb K, et al. International collaborative study to assess cardiovascular risk and evaluate long-term health in cats with preclinical hypertrophic cardiomyopathy and apparently healthy cats: The REVEAL study. *J Vet Intern Med* 2018;32:930-943.
42. Wasserstein RL, Lazar NA. The ASA's statement on p-values: context, process, and purpose. *Am Stat* 2016;70:129-193.
43. Harrington D, D'Agostino RB, Gatsonis C, et al. New guidelines for statistical reporting in the journal (editorial). *N Engl J Med* 2019;381:285-286.
