# Supplementary material for: Effects of pimobendan in cats with hypertrophic cardiomyopathy and recent congestive heart failure: Results of a prospective, double‐blind, randomized, nonpivotal, exploratory field study
Source: PubMed Central journal article supplement — J Vet Intern Med. 2021 Feb 5;35(2):789–800. doi: 10.1111/jvim.16054 (PMC7995419; doi:10.1111/jvim.16054), 2021-02-05
Supplement: JVIM-35-789-s007.pdf [file JVIM-35-789-s007.pdf]

1 **Supplement 2**

2

3 Complete Materials and Methods

4 ***Study Design***

5 This was a prospective, multicenter, double-blind, randomized, placebo-controlled, non-pivotal  
6 (exploratory) field study. The study protocol was prepared by the study sponsor in collaboration  
7 with independent cardiologists (JR, KS, and VLF) and approved by an ethical review committee  
8 at each site where this was required.

9 ***Cats***

10 Client-owned cats with prior (within the past 60 days) CHF secondary to HCM but without  
11 signs of congestion and heart failure at the time of enrollment were recruited by board-certified  
12 cardiologists at 10 centers (6 in the United States and 4 in Europe) between 2011 and 2013.  
13 Because of the non-pivotal (exploratory) nature of the study and absence of any published data in  
14 cats with HCM using a dose increase of furosemide as a component of the primary endpoint, and  
15 considering feasibility (anticipated length of enrollment period <18 months), a sample size of  
16 approximately 40 cats per treatment group was chosen. All clients of cats enrolled gave written  
17 informed consent for participation.

18 ***Inclusion criteria.*** Cats with body weight  $\geq 2$  kg, aged  $\geq 12$  months, with HCM and recent (but  
19 not current) diagnosis of CHF, clinical euvolemia, and hematocrit and total plasma protein  
20 concentration within the laboratory reference range were eligible. Presence of HCM was  
21 confirmed by a board-certified cardiologist in cats with increased left ventricular (LV) end-

22 diastolic wall thickness  $\geq 6$  mm of unknown cause as determined by transthoracic two-  
23 dimensional (2D) or M-mode echocardiography.<sup>1,27</sup> Cats with and without dynamic LVOTO  
24 were included. Obstructive HCM was defined by the presence of dynamic LVOTO with a peak  
25 systolic pressure gradient (PG) across the obstruction  $\geq 30$  mmHg as assessed by continuous  
26 wave Doppler and a late-peaking Doppler flow profile<sup>21,22,28</sup> while avoiding contamination of the  
27 outflow signal with mitral regurgitation. Non-obstructive HCM was defined by a peak systolic  
28 PG across the LVOT  $<30$  mmHg. Cats had to be clinically asymptomatic at enrollment without  
29 evidence of pulmonary edema and pleural effusion but with a history of clinical and radiographic  
30 evidence of CHF within the last 2 months ( $\leq 60$  days). One of the following diagnostic criteria  
31 had to be met for a cat to be considered to have CHF: 1) medical record documentation of  
32 thoracic radiographs from the investigator's site to support the diagnosis of CHF (cardiogenic  
33 pulmonary edema or pleural effusion or both), 2) historical diagnosis of CHF made by a board-  
34 certified cardiologist, 3) CHF based on thoracic radiographs provided by referring veterinarians  
35 and confirmed by the investigator, and 4) in situations where radiography could not be  
36 performed before treatment because of instability of the cat with clinical evidence of tachypnea,  
37 open mouth or labored breathing, response to treatment with furosemide, thoracocentesis, or  
38 some combination of these. After stabilization evidence of HCM on echocardiography severe  
39 enough to be compatible with prior CHF was a general requirement for enrollment. Center was  
40 not used as a stratification factor for enrollment.

41 ***Exclusion criteria.*** Conditions other than HCM capable of causing LV wall thickening; cardiac  
42 arrhythmias judged clinically relevant at the discretion of the investigator such as ventricular and  
43 supraventricular tachycardia, 3<sup>rd</sup> degree AV block, and atrial fibrillation; cases of CHF  
44 precipitated by known non-cardiac events such as parenteral fluid administration, treatment with

45 depot corticosteroids, anesthesia, and prior surgery; concurrent pulmonary or bronchial disease  
46 and heartworm infection; arterial thromboembolism; presence of intracardiac thrombi; systemic  
47 hypertension (repeated systolic blood pressure  $\geq 160$  mmHg); endocrinopathies; and, moderate  
48 to severe azotemia (BUN  $> 60$  mg/dL [ $>21$  mmol/L] and Creatinine  $> 2.5$  mg/dL [ $>221$   $\mu$ mol/L])  
49 were reasons leading to exclusion. Cats receiving  $\geq 1$  of the below treatments were not enrolled:  
50 sedation with ketamine, dexmedetomidine; treatment within the past 12 hours with nitroglycerin;  
51 treatment within the past 24 hours with angiotensin converting enzyme (ACE) inhibitors,  
52 antiarrhythmic drugs, diuretics other than furosemide, and antiplatelet medications other than  
53 clopidogrel; and treatment with anticoagulants, pimobendan within the past 7 days, and beta  
54 receptor blockers within the past 10 days.

55 Post-inclusion removal criteria included withdrawal of owner consent, development or  
56 worsening of dynamic LVOTO 2-5 hours post-medication after the first dose on Day [D] 0;  
57 increase in systolic LVOT PG of  $> 25$  mmHg in a previously obstructive cat or development of a  
58 systolic LVOT PG  $> 50$  mmHg in a previously non-obstructive cat), total daily furosemide dose  
59  $> 10$  mg/kg; development of adverse events necessitating unblinding; concomitant  
60 cardiovascular medications deemed necessary by the investigator; arterial thromboembolism;  
61 removal deemed necessary by the investigator for animal welfare reasons; and, discovery post-  
62 enrollment that the animal did not meet inclusion criteria.

### 63 ***Randomization and Allocation***

64 Each cat that deemed eligible during screening examination (on Day -1 [D-1] or D0) was  
65 stratified by the presence or absence of dynamic LVOTO and subsequently randomized within  
66 their respective stratum to receive either pimobendan or placebo in a 1:1 allocation ratio.

67 ***Blinding***

68 Investigators, owners, study monitors, and statisticians were blinded to treatment allocation  
69 during the study period. Access to the blinding code for the study group was limited to  
70 individuals who were otherwise independent of the study. In the event of a medical emergency;  
71 or if the study endpoint was reached; or at the particular request by the cat owner; predefined  
72 procedures were available to permit immediate disclosure of the study medication. In the event  
73 of premature unblinding the cat would be censored from the study at that time.

74 The study medication (placebo and pimobendan) was supplied as visually indistinguishable  
75 tablets. Sufficient tablets for treatment until the next visit were supplied to the owner on D0 and  
76 on each scheduled re-examination day until the study was completed. The tablet was offered to  
77 the cat for voluntary ingestion or administered directly into the mouth and was given at the same  
78 time the other medications were administered. Treatment started on D0.

79 ***Study Medication***

80 Pimobendan tablets (Vetmedin® Flavour tablets 1.25 mg in the Europe, Boehringer Ingelheim  
81 Vetmedica GmbH, Ingelheim, Germany and Vetmedin® Chewable tablets 1.25 mg in the United  
82 States, Boehringer Ingelheim Vetmedica Inc., Saint Joseph, MO) and placebo were identical in  
83 terms of appearance, smell, and taste at all study sites. Both pimobendan and placebo were  
84 administered orally twice daily at the same dose, depending on body weight: 2 to 3.1 kg (0.5  
85 tablet), >3.1 to 5.2 kg (1 tablet), >5.2 to 7.2 kg (1.5 tablets), and > 7.2 kg (2 tablets). The total  
86 target dose of pimobendan was 0.6 mg/kg/d, divided into 2 equal portions administered  
87 approximately 12 hours apart. The dose of the study medication was not adjusted throughout the  
88 study.

89 ***Concomitant Treatments***

90 Concomitant administration of furosemide (Furozenol® 10 mg tablets in Europe and Salix®  
91 12.5 mg tablets in the United States) and clopidogrel (Plavix® 75 mg tablets) was allowed. The  
92 necessity and dose of these treatments were at the discretion of the individual investigators. After  
93 the primary endpoint was reached or the study was completed, the study drug was discontinued,  
94 and cats received additional treatments and adjusted doses of current treatments as deemed  
95 medically indicated at the investigator's discretion.

96 ***Population analyzed***

97 For the purpose of statistical analysis, 4 cat populations were defined as follows: the safety set  
98 (SAF), the full analysis set (FAS), the per-protocol set 1 (PPS1), and the per-protocol set 2  
99 (PPS2; Fig. 1). The SAF set consisted of all cats that were randomized and received at least 1  
100 dose of the study medication. The FAS set was a subset of SAF with any cats violating inclusion  
101 criteria removed. The PPS1 population consisted of all cats of the FAS that reasonably complied  
102 with the protocol. Minor deviations from the ideal still may have occurred, but major protocol  
103 deviations affecting ability to assess treatment success led to exclusion from this protocol set.  
104 Finally, the PPS2 population consisted of all cats of the PPS1 population, but with removal of  
105 cats that fulfilled the post-inclusion withdrawal criterion 'development or worsening of dynamic  
106 LVOTO on D0'.

107 ***Schedule of Events***

108 Before enrollment, all cats underwent a physical examination, blood pressure measurement, a  
109 complete blood cell count, and blood biochemical analysis including total plasma thyroxine  
110 concentration, thoracic radiography, ECG, and echocardiography (Table S1). Whenever possible,

111 examinations were performed with the cats non-sedated. If sedation was used, the same type and  
112 dose had to be used for repeated examinations. Cats were re-examined on D10, D60, and D180,  
113 and updates from the owners via telephone interviews were obtained on D90, D120, and D150.  
114 Unscheduled visits, if applicable, were made if a cat was showing clinical signs, if owner  
115 concerns were expressed, or when cats reached a study end point. An owner dosing log was  
116 conducted daily throughout the study.

### 117 ***Endpoints***

118 The primary endpoint of the study was successful outcome at D180, defined as remaining in the  
119 study without an increase in furosemide dose. Withdrawal from the study for any reason before  
120 D180, or an increase in furosemide dose therefore would indicate failure to meet the primary  
121 endpoint. The secondary endpoints were time to withdrawal from the study; time to morbidity or  
122 mortality; time to first furosemide escalation; time to furosemide dose > 10 mg/kg/d; time to  
123 hospitalization for CHF; time to requiring precluded medications; time to aortic  
124 thromboembolism (ATE); and increase of severity of LVOTO (as defined previously). Decisions  
125 regarding dose escalation of furosemide (due to recurrence of signs of CHF using criteria  
126 prospectively determined) and initiation of precluded medications were made at the discretion of  
127 the individual investigator.<sup>3</sup>

### 128 ***Diagnostic Methods***

129 The sequence of applied study methods is summarized in Table S1. Cardiac auscultation was  
130 performed and heart rate, rhythm, presence of a gallop sound, and presence and intensity of a  
131 heart murmur were recorded. Rate of respiration was determined. Body weight was measured at  
132 each visit. Doppler blood pressure measurements,<sup>29</sup> thoracic radiography,<sup>30,31</sup> transthoracic

133 echocardiography (exclusively performed by the investigators),<sup>32</sup> and electrocardiography<sup>33</sup> were  
134 performed and analyzed as previously reported (Supplement 1).

### 135 ***Safety Monitoring***

136 Safety was monitored throughout the study, and nature, frequency, and outcome of adverse  
137 events in the SAF population (n=82) were recorded. Adverse events were classified following  
138 the principles of Good Veterinary Practice on the basis of System Organ Class. For general  
139 safety aspects, the systolic PG across the LVOT was monitored by repeating echocardiographic  
140 measurements 2 to 5 hours post medication (the expected time of peak positive inotropic effect  
141 of pimobendan based on available data in dogs at the beginning of the study) on D0, D10, D60,  
142 and D180 and during any unscheduled visit. Development of new LVOTO or increased severity  
143 of existing LVOTO at baseline under the same diagnostic conditions raised safety concerns and  
144 were addressed under the premises outlined below. During the study, an independent, unblinded  
145 pharmacovigilance scientist of the study sponsor familiar with the protocol and the disease but in  
146 no way associated with the study monitored the data pertaining the systolic PG across the LVOT  
147 and clinical signs 2 to 5 hours post administration of the drug on D0. A Data and Safety  
148 Monitoring Board was set up that included study sponsor personnel and independent cardiology  
149 consultants blinded to the study site and specific cats enrolled (JR and KES). This Data and  
150 Safety Monitoring Board would be responsible for critical review of the study if the following *a-*  
151 *priori* criteria were met: development of LVOTO (defined as systolic PG > 50 mmHg) in  
152 previously non-obstructive cats; worsening of LVOTO in previously obstructive cats (defined as  
153 an increase systolic PG > 25 mmHg) in at least 3 of the first 10 cats treated with pimobendan; or  
154 if 3 consecutive cats treated with pimobendan had new development or worsening of pre-existing  
155 LVOTO on D0, as defined above.

156 ***Statistical Analysis***

157 Statistical analysis was performed using commercially available software (SAS<sup>®</sup> System Version  
158 9.2, SAS Institute, Cary, NC). Normality of data was assessed by visual inspection, the  
159 Kolmogorov-Smirnov test, and for some variables the D’Agostino & Pearson test. The null  
160 hypothesis “success rate of cats treated with pimobendan is equal to success rate of cats treated  
161 with placebo” was tested against its alternative hypothesis by means of a 2-sided Cochran-  
162 Mantel-Haenszel test<sup>38,39</sup> controlled for LVOTO as stratification variable. Adjusted Mantel-  
163 Haenszel type odds ratios (OR) with 95% confidence intervals (CI) were provided to quantify the  
164 treatment effect. The Breslow-Day test<sup>40</sup> was used to assess homogeneity among LVOTO  
165 subgroups. To evaluate the sensitivity of the primary analysis, logistic regression analysis was  
166 performed with treatment and LVOTO as fixed effects and the continuous covariate furosemide  
167 dose (mg/kg) as baseline. Additional sensitivity analysis was done using a logistic regression  
168 model encompassing ‘center’ as a random effect. The ‘center’ effect also was evaluated visually  
169 by graphical display considering individual centers. Group differences for time-to-event  
170 secondary endpoints were evaluated using proportional hazard regression analysis with main  
171 effects of treatment and LVOTO. Cats that had experienced no events were censored on D180 or  
172 at the day of study removal. Effects of treatment, LVOTO, sex, age, body weight, diastolic class,  
173 and furosemide dose on D0 on outcome were analyzed using various logistic regression models.  
174 A P value  $\leq .05$  and ORs with 95% CIs not including 1.0 were considered significant.

175

176 **References**



- 177 1. Luis Fuentes V, Abbott J, Chetboul V, et al. ACVIM consensus statement guidelines for the  
178 classification, diagnosis, and management of cardiomyopathies in cats. *J Vet Intern Med*  
179 2020;34:1062-1077.
- 180 3. Ferasin L, DeFrancesco T. Management of acute heart failure in cats. *J Vet Cardiol*  
181 2015;17:S173-S189.
- 182 21. Gersh BJ, Maron BJ, Bonow RO, et al. 2011 ACCF/AHA guideline for the diagnosis and  
183 treatment of hypertrophic cardiomyopathy. A report of the American College of Cardiology  
184 Foundation/American heart Association task Force on practice guidelines. *Circulation*  
185 2011;124:e783-e831.
- 186 22. Elliott PM, Anastasakis A, Borger MA, et al. 2014 ESC guidelines on diagnosis and  
187 management of hypertrophic cardiomyopathy. *Eur Heart J* 2014;35:2733-2779.
- 188 27. Fox PR, Liu SK, Maron BJ. Echocardiographic assessment of spontaneously occurring feline  
189 hypertrophic cardiomyopathy. An animal model of human disease. *Circulation* 1995;92:2645-  
190 2651.
- 191 28. Coleman AE, DeFrancesco TC, Griffiths EH, et al. Atenolol in cats with subclinical  
192 hypertrophic cardiomyopathy: a double-blind, placebo-controlled, randomized clinical trial of  
193 effect on quality of life, activity, and cardiac biomarkers. *J Vet Cardiol* 2020;30:77-91.
- 194 29. Acierno MJ, Brown S, Coleman AE, et al. ACVIM consensus statement: Guidelines for the  
195 identification, evaluation, and management of systemic hypertension in dogs and cats. *J Vet*  
196 *Intern Med* 2018;32:1803-1822.

- 197 30. Guglielmini C, Diana A. Thoracic radiography in the cat: identification of cardiomegaly and  
198 congestive heart failure. *J Vet Cardiol* 2015;17:S87-S101.
- 199 31. Litster AL, Buchanan JW. Vertebral scale system to measure heart size in radiographs of  
200 cats. *J Am Vet Med Assoc* 2000;2016:210-214.
- 201 32. Schober KE, Chetboul V. Echocardiographic evaluation of left ventricular diastolic function  
202 in cats: hemodynamic determinants and pattern recognition. *J Vet Cardiol*. 2015;17:S102-S133.
- 203 33. Tilley LP. *Essentials of Canine and Feline Electrocardiography*. 4<sup>rd</sup> edition, Philadelphia,  
204 PA: Lea & Febiger; 1993.
- 205 38. Cochran WG. Some methods for strengthening the common  $\chi^2$  tests. *Biometrics*  
206 1954;10:417-451.
- 207 39. Mantel N, Haenszel W. Statistical aspects of the analysis of data from retrospective studies of  
208 disease. *J Natl Cancer Institute* 1959;22:719-748.
- 209 40. Breslow NE, Day NE, Halvorsen KT, et al. Estimation of multiple relative risk functions in  
210 matched case-control studies. *Am J Epidemiol* 1978;108:299-307.
