# Supplementary material for: Effects of pimobendan in cats with hypertrophic cardiomyopathy and recent congestive heart failure: Results of a prospective, double‐blind, randomized, nonpivotal, exploratory field study
Source: PubMed Central journal article supplement — J Vet Intern Med. 2021 Feb 5;35(2):789–800. doi: 10.1111/jvim.16054 (PMC7995419; doi:10.1111/jvim.16054), 2021-02-05
Supplement: JVIM-35-789-s008.pdf [file JVIM-35-789-s008.pdf]

**Table S4** – Summary statistics of the echocardiographically estimated\* systolic pressure gradient (mmHg) across the left ventricular outflow tract (LVOT) for each examination in cats *with* LVOT obstruction (FAS, n=29)

| Treatment         | Visit | N  | N miss | Mean | SD | Min | Q1 | Median | Q3  | Max |
|-------------------|-------|----|--------|------|----|-----|----|--------|-----|-----|
| <b>Pimobendan</b> | D0    | 14 | 0      | 91   | 40 | 35  | 67 | 77     | 122 | 153 |
|                   | D0-pp | 14 | 0      | 96   | 37 | 30  | 72 | 99     | 124 | 150 |
|                   | D10   | 7  | 2      | 79   | 45 | 31  | 41 | 71     | 137 | 142 |
|                   | D60   | 6  | 0      | 57   | 47 | 9   | 10 | 53     | 96  | 122 |
|                   | D180  | 6  | 0      | 42   | 39 | 4   | 7  | 40     | 72  | 91  |
| <b>Placebo</b>    | D0    | 15 | 0      | 77   | 42 | 30  | 41 | 72     | 106 | 171 |
|                   | D0-pp | 15 | 0      | 67   | 36 | 16  | 41 | 54     | 103 | 139 |
|                   | D10   | 13 | 2      | 62   | 44 | 19  | 26 | 58     | 64  | 155 |
|                   | D60   | 15 | 0      | 42   | 43 | 6   | 18 | 27     | 42  | 170 |
|                   | D180  | 12 | 0      | 33   | 46 | 5   | 8  | 13     | 46  | 168 |

*Notes:* \*, pressure gradient (mmHg) =  $4 \times V \text{ (m/s)}^2$ . Due to the small number of observations and multiple comparisons, *P* values for between-day and between-group comparisons are not reported.<sup>42,43</sup>

Abbreviations: N miss, number of missing values; D0-pp, study on Day0 2-5 hours post medication.

## References

2. Fox PF, Keene BW, Lamb K, et al. International collaborative study to assess cardiovascular risk and evaluate long-term health in cats with preclinical hypertrophic cardiomyopathy and apparently healthy cats: The REVEAL study. *J Vet Intern Med* 2018;32:930-943.
42. Wasserstein RL, Lazar NA. The ASA's statement on p-values: context, process, and purpose. *Am Stat* 2016;70:129-193.
43. Harrington D, D'Agostino RB, Gatsonis C, et al. New guidelines for statistical reporting in the journal (editorial). *N Engl J Med* 2019;381:285-286.
