# Supplementary material for: Effects of pimobendan in cats with hypertrophic cardiomyopathy and recent congestive heart failure: Results of a prospective, double‐blind, randomized, nonpivotal, exploratory field study
Source: PubMed Central journal article supplement — J Vet Intern Med. 2021 Feb 5;35(2):789–800. doi: 10.1111/jvim.16054 (PMC7995419; doi:10.1111/jvim.16054), 2021-02-05
Supplement: JVIM-35-789-s009.pdf [file JVIM-35-789-s009.pdf]

**Table S2** – Population of cats studied

|                       | <b>Pimobendan</b> |            | <b>Placebo</b> |            | <b>Total</b> |            |
|-----------------------|-------------------|------------|----------------|------------|--------------|------------|
|                       | N                 | %          | N              | %          | N            | %          |
| <b>All randomized</b> | <b>44</b>         | <b>100</b> | <b>39</b>      | <b>100</b> | <b>83</b>    | <b>100</b> |
| - with LVOTO          | 15                | 34         | 15             | 39         | 30           | 36         |
| - without LVOTO       | 29                | 66         | 24             | 61         | 53           | 64         |
| <b>SAF</b>            | <b>43</b>         | <b>100</b> | <b>39</b>      | <b>100</b> | <b>82</b>    | <b>100</b> |
| - with LVOTO          | 15                | 35         | 15             | 39         | 30           | 37         |
| - without LVOTO       | 28                | 65         | 24             | 61         | 52           | 63         |
| <b>FAS</b>            | <b>39</b>         | <b>100</b> | <b>37</b>      | <b>100</b> | <b>76</b>    | <b>100</b> |
| - with LVOTO          | 14                | 36         | 15             | 40         | 29           | 38         |
| - without LVOTO       | 25                | 64         | 22             | 60         | 47           | 62         |
| <b>PPS1</b>           | <b>33</b>         | <b>100</b> | <b>29</b>      | <b>100</b> | <b>62</b>    | <b>100</b> |
| - with LVOTO          | 11                | 33         | 13             | 45         | 24           | 39         |
| - without LVOTO       | 22                | 67         | 16             | 55         | 38           | 61         |
| <b>PPS2</b>           | <b>30</b>         | <b>100</b> | <b>29</b>      | <b>100</b> | <b>59</b>    | <b>100</b> |
| - with LVOTO          | 8                 | 27         | 13             | 45         | 21           | 36         |
| - without LVOTO       | 22                | 73         | 16             | 55         | 38           | 64         |

Abbreviations: N, number of cats; LVOTO, left ventricular outflow tract obstruction; SAF, safety analysis set population; FAS, full analysis set population; PPS1, per protocol set 1 population; PPS2, per protocol set 2 population.
