# Supplementary material for: Effects of pimobendan in cats with hypertrophic cardiomyopathy and recent congestive heart failure: Results of a prospective, double‐blind, randomized, nonpivotal, exploratory field study
Source: PubMed Central journal article supplement — J Vet Intern Med. 2021 Feb 5;35(2):789–800. doi: 10.1111/jvim.16054 (PMC7995419; doi:10.1111/jvim.16054), 2021-02-05
Supplement: JVIM-35-789-s011.pdf [file JVIM-35-789-s011.pdf]

**Table S6** – Furosemide dose (mg/kg) and dose adjustments in the FAS population (n=76)

|                                                     | Group    | Treatment  | N  | Mean ± SD  | Median | Min  | Max |
|-----------------------------------------------------|----------|------------|----|------------|--------|------|-----|
| D0                                                  | All      | Pimobendan | 39 | 3.4 ± 1.92 | 2.8    | 0.6  | 8.1 |
|                                                     |          | Placebo    | 37 | 3.6 ± 1.98 | 3.2    | 0.6  | 7.0 |
|                                                     | LVOTO    | Pimobendan | 14 | 3.6 ± 1.43 | 3.6    | 1.4  | 5.8 |
|                                                     |          | Placebo    | 15 | 4.5 ± 2.01 | 4.0    | 1.3  | 7.0 |
|                                                     | No LVOTO | Pimobendan | 25 | 3.3 ± 2.16 | 2.5    | 0.6  | 8.1 |
|                                                     |          | Placebo    | 22 | 3.0 ± 1.71 | 2.5    | 0.6  | 6.5 |
| Average dose over study period                      | All      | Pimobendan | 39 | 3.7 ± 2.82 | 3.2    | 0.0  | 9.5 |
|                                                     |          | Placebo    | 37 | 4.1 ± 2.34 | 4.1    | 0.6  | 9.6 |
|                                                     | LVOTO    | Pimobendan | 14 | 3.5 ± 2.40 | 3.6    | 0.0  | 7.1 |
|                                                     |          | Placebo    | 15 | 4.8 ± 2.41 | 4.5    | 1.0  | 9.6 |
|                                                     | No LVOTO | Pimobendan | 25 | 3.8 ± 3.07 | 2.3    | 0.5  | 9.5 |
|                                                     |          | Placebo    | 22 | 3.7 ± 2.24 | 3.4    | 0.6  | 8.5 |
| Time adjusted AUC of dose as difference to baseline | All      | Pimobendan | 28 | 0.6 ± 1.85 | 0.3    | -4.3 | 4.5 |
|                                                     |          | Placebo    | 30 | 0.7 ± 1.29 | 0.6    | -2.5 | 3.4 |
|                                                     | LVOTO    | Pimobendan | 9  | 0.4 ± 2.29 | 0.4    | -4.3 | 4.2 |
|                                                     |          | Placebo    | 12 | 0.3 ± 1.60 | 0.3    | -2.5 | 3.4 |
|                                                     | No LVOTO | Pimobendan | 19 | 0.7 ± 1.67 | 0.2    | -1.6 | 4.5 |
|                                                     |          | Placebo    | 18 | 0.9 ± 1.03 | 0.9    | -0.9 | 2.7 |

*Notes:* There were no differences of furosemide between treatments for all groups ( $P > .05$ ).

Abbreviations: FAS, full analysis set population; LVOTO, left ventricular outflow tract obstruction; D0, day of first administration of medication; AUC, area under the curve.
