# Supplementary material for: Effects of pimobendan in cats with hypertrophic cardiomyopathy and recent congestive heart failure: Results of a prospective, double‐blind, randomized, nonpivotal, exploratory field study
Source: PubMed Central journal article supplement — J Vet Intern Med. 2021 Feb 5;35(2):789–800. doi: 10.1111/jvim.16054 (PMC7995419; doi:10.1111/jvim.16054), 2021-02-05
Supplement: JVIM-35-789-s013.pdf [file JVIM-35-789-s013.pdf]

**Table S8** – Results of proportional hazards regression analysis of secondary endpoints for detection of differences between treatment groups in the FAS and PPS2 populations

| Endpoint                                                                        | FAS          |              |              | PPS2         |              |      |
|---------------------------------------------------------------------------------|--------------|--------------|--------------|--------------|--------------|------|
| Endpoint                                                                        | Hazard ratio | 95% CI       | P            | Hazard ratio | 95% CI       | P    |
| Time to study withdrawal                                                        |              |              |              |              |              |      |
| All                                                                             | 0.96         | 0.54 – 1.71  | .89          | 0.82         | 0.41 – 1.64  | .57  |
| LVOTO                                                                           | 3.14         | 1.13 – 8.73  | <b>.028*</b> | 1.82         | 0.48 – 6.80  | .39  |
| No LVOTO                                                                        | 0.55         | 0.28 – 1.10  | .089         | 0.63         | 0.29 – 1.38  | .25  |
| Time to cardiac death, euthanasia due to cardiac disease, and treatment failure |              |              |              |              |              |      |
| All                                                                             | 0.87         | 0.35 – 2.18  | .77          | 0.92         | 0.32 – 2.59  | .87  |
| LVOTO                                                                           | 2.04         | 0.29 – 14.49 | .48          | 2.28         | 0.14 – 36.48 | .56  |
| No LVOTO                                                                        | 0.70         | 0.25 – 1.95  | .50          | .80          | 0.27 – 2.39  | .69  |
| Time to 1 <sup>st</sup> escalation of furosemide dose                           |              |              |              |              |              |      |
| All                                                                             | 0.77         | 0.39 – 1.52  | .45          | 0.80         | 0.37 – 1.72  | .56  |
| LVOTO                                                                           | 1.78         | 0.54 – 5.87  | .35          | 1.82         | 0.48 – 6.80  | 0.38 |
| No LVOTO                                                                        | 0.56         | 0.25 – 1.22  | .14          | 0.57         | 0.23 – 1.37  | 0.21 |
| Time to furosemide >10 mg/kg/d                                                  |              |              |              |              |              |      |
| All                                                                             | 1.25         | 0.33 – 4.75  | .75          | 0.79         | 0.19 – 3.23  | .74  |
| LVOTO                                                                           | n.d.         | n.d.         | n.d.         | n.d.         | n.d.         | n.d. |
| No LVOTO                                                                        | 0.61         | 0.14 – 2.73  | .52          | 0.51         | 0.11 – 2.31  | .39  |

*Notes:* \*, includes 3 cats that were withdrawn from the study due to worsening of LVOTO on D1.

Due to low number of observations (1 in each treatment group) data on time to arterial thromboembolism are not displayed.

Abbreviations: PPS2, per protocol set 2; CI, confidence interval; LVOTO, left ventricular outflow tract obstruction; n.d., not determined due to the low number of observations.
