# Supplementary material for: Effects of pimobendan in cats with hypertrophic cardiomyopathy and recent congestive heart failure: Results of a prospective, double‐blind, randomized, nonpivotal, exploratory field study
Source: PubMed Central journal article supplement — J Vet Intern Med. 2021 Feb 5;35(2):789–800. doi: 10.1111/jvim.16054 (PMC7995419; doi:10.1111/jvim.16054), 2021-02-05
Supplement: JVIM-35-789-s014.pdf [file JVIM-35-789-s014.pdf]

**Table S10** – Criteria used for classification of left ventricular diastolic function

| <b>Class 1</b>     | <b>Class 2</b>     | <b>Class 3</b>     | <b>Class 4</b>     | <b>Class 5</b>     |
|--------------------|--------------------|--------------------|--------------------|--------------------|
| Normal             | Abnormal           | Abnormal           | Abnormal           | Abnormal           |
|                    | left ventricular   | left ventricular   | left ventricular   | left ventricular   |
|                    | diastolic function | diastolic function | diastolic function | diastolic function |
| Transmitral flow   | Transmitral flow   | Transmitral flow   | “Pseudonormal”     | “Restrictive”      |
| pattern suggestive | pattern suggestive | pattern suggestive | transmitral flow   | transmitral flow   |
| of normal          | delayed relaxation | delayed relaxation | pattern indicating | pattern            |
| relaxation and     | and normal filling | and mildly to      | delayed relaxation | indicating         |
| normal filling     | pressure           | moderately         | and moderately to  | delayed            |
| pressure           |                    | increased filling  | severely increased | relaxation and     |
|                    |                    | pressure           | filling pressure   | severely           |
|                    |                    |                    |                    | increased filling  |
|                    |                    |                    |                    | pressure           |
| IVRT 37-60 ms      | IVRT > 60 ms       | IVRT $\geq$ 37 ms  | IVRT $\geq$ 37 ms  | IVRT < 37 ms       |
| 1.0 < E:A < 2.0    | E:A < 1.0          | E:A < 1.0          | 1.0 < E:A < 2.0    | E:A > 2.0          |
| E:E' < 12          | E:E' < 12          | E:E' $\geq$ 12     | E:E' $\geq$ 12     | E:E' $\geq$ 12     |

*Notes:* If E and A waves were summated, this variable was not used for diastolic classification.

In this case, only IVRT and E:A were considered.

Abbreviations: IVRT, isovolumic relaxation time; E:A, ratio of early (E) to late (A) peak transmitral filling flow velocity; E:E', ratio of E to peak early diastolic mitral annular velocity.
