# Supplementary figures and images for: Effects of pimobendan in cats with hypertrophic cardiomyopathy and recent congestive heart failure: Results of a prospective, double‐blind, randomized, nonpivotal, exploratory field study
Source: PubMed Central journal article supplement — J Vet Intern Med. 2021 Feb 5;35(2):789–800. doi: 10.1111/jvim.16054 (PMC7995419; doi:10.1111/jvim.16054), 2021-02-05

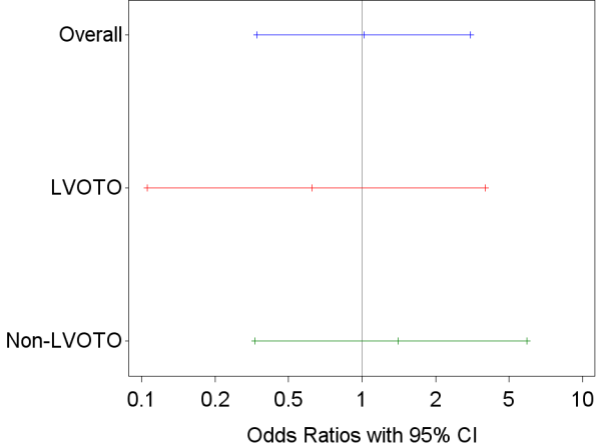

Supplement: JVIM-35-789-s001.pdf [file JVIM-35-789-s001.pdf]

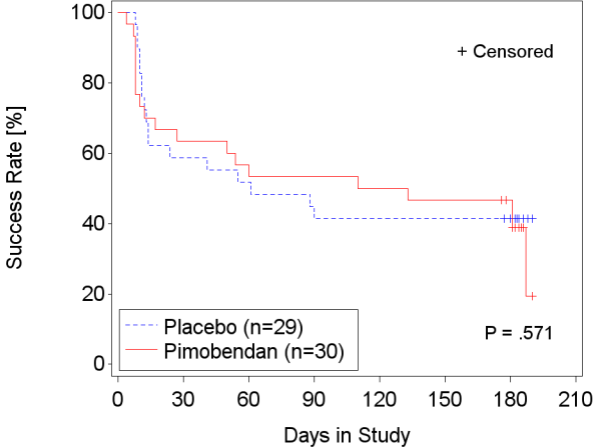

Supplement: JVIM-35-789-s010.pdf [file JVIM-35-789-s010.pdf]
